# Supplementary material
Source: PubMed Central journal article supplement (PMC2614111)
Supplement: NIHMS63373-supplement-02.pdf [file NIHMS63373-supplement-02.pdf]

## **Appendix 1. Functional Status Measures**

### **Background**

Assessment of neurological recovery is an important component of evaluating the effects of resuscitation interventions. Neurological injury after cardiac arrest contributes to in-hospital death often because of withdrawal of care.<sup>1</sup> Some surviving patients have decrements in cognitive function,<sup>2-4</sup> although most surviving patients enjoy good quality of life.<sup>5;6</sup> Neurological status varies over time with large improvements during the first few days after resuscitation.<sup>7;8</sup> Detailed neuropsychiatric testing reveals that most improvement occurs during the first 3 months after resuscitation,<sup>3;7</sup> with only small clinical changes during rehabilitation in those with severe anoxic brain injury.<sup>9;10</sup> These studies suggest that it is possible to reliably measure neurological status three months after resuscitation. Criteria for choosing an instrument to measure neurological status include prior data about reliability and validity, availability of instruments suitable for a multicenter trial, and application to prior cardiac arrest survivors.

The **Modified Rankin Scale (MRS)** will be assessed from the clinical record prior to discharge and by telephone interview after discharge. It has face validity and can be determined in person or over the telephone. MRS has concurrent validity with other measures of neurological recovery after stroke and brain injury.<sup>11;12</sup> Use of a structured interview in a recent study of stroke patients improved the weighted kappa from 0.71 to 0.91<sup>13</sup>. The only previous published applications of MRS to survivors of cardiac arrest evaluated a cohort of neurosurgical patients with in-hospital cardiac arrest<sup>14</sup> and a cohort of survivors of out-of-hospital cardiac arrest.<sup>4</sup>

The **Cerebral Performance Category (CPC)** will be assessed from the clinical record prior to discharge and by telephone interview after discharge. Consensus statements recommend use of the CPC to assess functional outcomes after resuscitation from cardiac arrest.<sup>15;16</sup> CPC is a five-

point scale that was adapted from the Glasgow Outcome Scale.<sup>17;18</sup> CPC has limited discrimination between mild and moderate brain injury. A small study with incomplete follow-up of survivors demonstrated only moderate correlation with other measures of health-related quality of life.<sup>19</sup> However, CPC at discharge predicts long-term survival.<sup>20</sup>

An interesting question is whether simple MRS or CPC scores at discharge correlate with more detailed assessments post discharge. We primarily intend to apply the MRS and CPC at discharge and will apply more detailed measures once the patient has been contacted post discharge. A limitation to the post discharge assessment of MRS or CPC scores is that there is no well-validated 26 instrument for either measure. Also, proxy respondents tend to overestimate patient burden,<sup>21</sup> and may or may not be available for interview. Therefore, we shall assess MRS or CPC at discharge based on review of the clinical record, and after discharge based on interview at three and six months. MRS will be assessed after discharge by using an instrument validated for telephone administration.<sup>13</sup> CPC will be assessed by using a structured questionnaire via telephone administration. These latter questions were developed based on experience assessing outcomes after discharge in the OPALS study, PAD trial and ASPIRE trial as well as previous work by others to develop a structured phone interview to assess the related Glasgow Outcome Score.<sup>22</sup> However, it should be recognized that these questions have not been validated in their current format.

Generic health-related quality of life<sup>23;24</sup> will be measured three and six months after discharge by administering the **Health Utilities Index Mark 3 HUI system**.<sup>25</sup> The interview-administered version of HUI3 requires completion of a maximum of 39 questions. ([www.healthutilities.com](http://www.healthutilities.com) accessed on October 14, 2005). The HUI3 consists of eight attributes of health (vision, hearing, speech, mobility, dexterity, emotion, cognition, and pain) with 5 or 6 levels per attribute. For each attribute, no, or mild, impairment in health has been defined as better than level 3 function (or

level 4 function in the cognitive attributes). For each respondent, health status is described as a vector that combines the levels of each attribute. The health status information is then converted into a utility score of health-related quality of life on a scale from perfect health (1.0) to death (0).<sup>25,26</sup> Shown to be reliable and valid in other populations.<sup>27-29</sup> The HUI3 has been used in several ongoing studies of interventions for individuals with sudden cardiac arrest.<sup>5,30</sup> This health-related quality of life index is consistent with current standards for economic evaluation of health technologies.<sup>31</sup>

Neurological status will be measured at one, three and six months after discharge by using the **Adult Lifestyle and Function (ALFI) version of the Mini-Mental Status Exam (MMSE)**.<sup>32,33</sup> The ALFI-MMSE has 23 items. Our experience using it in the PAD trial suggests that it requires approximately five minutes to administer. It is scored from 0 to 22, with a cutoff of 16/17 used to determine cognitive impairment. ALFI-MMSE correlates strongly (Pearson's  $r$  0.73 to 0.85) with face-to-face MMSE across all patients or when grouped by Clinical Dementia Rating Scale class.<sup>33</sup> Five items were discrepant ( $p < 0.05$ ) between phone and face-to-face versions: day of the week, county, name of place, phrase repetition, and registration of the term "penny." Respondents were more likely to give incorrect answers face-to-face to the first three of these items, while repetition and registration of the item "penny" were significantly less accurate over the phone. Compared to the brief neuropsychiatric screening test, which is a weighted score of the Trailmaking A,<sup>34</sup> Word Fluency,<sup>35</sup> Weschler Memory Scale-Mental Control and Logical Memory,<sup>36</sup> ALFI-MMSE had a sensitivity of 68% and specificity of 100% for mild cognitive impairment. The corresponding MMSE values were 67% and 100%.

Finally, depression will be assessed three and six months after discharge by using the **Geriatric Depression Scale** administered by telephone (T-GDS)<sup>37</sup> since depression is observed in those with cardiovascular disease<sup>38</sup> or those who have survived cardiac arrest,<sup>3</sup> and can be difficult to

differentiate from cognitive impairment. This instrument has 30 items that are answered either 'yes' or 'no.' It is scored from 0 to 30, with a cutoff of 10/11 used to determine cognitive impairment.<sup>39</sup> T-GDS has moderate test-retest reliability during a one-week period (Kappa 0.35 to 0.7, mean 0.52) Using a cutoff of 10/11 T-GDS has a sensitivity of 86% and specificity of 70% for detecting depression compared to a comprehensive assessment by a geriatric psychiatrist. Although initially designed to measure depression in older adults, it is also internally consistent and valid in younger adults.<sup>40</sup>

### References for Functional Status Measures

- (1) Niemann JT, Stratton SJ. The Utstein template and the effect of in-hospital decisions: the impact of do-not-attempt resuscitation status on survival to discharge statistics. *Resuscitation* 2001; 51(3):233-237.
- (2) Yarnell PR. Neurological outcome of prolonged coma survivors of out-of-hospital cardiac arrest. *Stroke* 1976; 7(3):279-282.
- (3) Roine RO, Kajaste S, Kaste M. Neuropsychological sequelae of cardiac arrest. *JAMA* 1993; 269:237-242.
- (4) van Alem AP, de Vos R, Schmand B, Koster RW. Cognitive impairment in survivors of out-of-hospital cardiac arrest. *Am Heart J* 2004; 148(3):416-421.
- (5) Nichol G, Stiell IG, Hebert P, Wells G, Vandemheen K, Laupacis A. What is the Quality of Life of Survivors of Cardiac Arrest? A Prospective Study. *Acad Emerg Med* 1999; 6:95-102.
- (6) van Alem AP, Waalewijn RA, Koster RW, de Vos R. Assessment of quality of life and cognitive function after out-of-hospital cardiac arrest with successful resuscitation. *The American Journal of Cardiology* 2004; 93(2):131-135.
- (7) Edgren E, Hedstrand U, Kelsey S, Sutton-Tyrrell K, Safar P, BRCTI Study Group. Assessment of neurological prognosis in comatose survivors of cardiac arrest. *The Lancet* 1994; 343(8905):1055-1059.
- (8) Booth CM, Boone RH, Tomlinson G, Detsky AS. Is This Patient Dead, Vegetative, or Severely Neurologically Impaired?: Assessing Outcome for Comatose Survivors of Cardiac Arrest. *JAMA: The Journal of the American Medical Association* 2004; 291(7):870-879.
- (9) Fertl E, Vass K, Sterz F, Gabriel H, Auff E. Neurological rehabilitation of severely disabled cardiac arrest survivors. Part I. Course of post-acute inpatient treatment. *Resuscitation* 2000; 47(3):231-239.
- (10) Pusswald G, Fertl E, Falzl M, Auff E. Neurological rehabilitation of severely disabled cardiac arrest survivors. Part II. Life situation of patients and families after treatment. *Resuscitation* 2000; 47(3):241-248.
- (11) Hop JW, Rinkel GJ, Algra A, van Gijn J. Changes in functional outcome and quality of life in patients and caregivers after aneurysmal subarachnoid hemorrhage. *J Neurosurg* 2001; 95(6):957-963.
- (12) Weimar C, Kurth T, Kraywinkel K, Wagner M, Busse O, Haberl RL et al. Assessment of functioning and disability after ischemic stroke. *Stroke* 2002; 33(8):2053-2059.

- (13) Wilson JTL, Hareendran A, Hendry A, Potter J, Bone I, Muir KW. Reliability of the Modified Rankin Scale Across Multiple Raters: Benefits of a Structured Interview. *Stroke* 2005; 36(4):777-781.
- (14) Rabinstein AA, McClelland RL, Wijdicks EF, Manno EM, Atkinson JL. Cardiopulmonary resuscitation in critically ill neurologic-neurosurgical patients. *Mayo Clin Proc* 2004; 79(11):1391-1395.
- (15) Cummins RO, Chamberlain DA, Abramson NS, Allen M, Baskett PJ, Becker L et al. Recommended guidelines for uniform reporting of data from out-of-hospital cardiac arrest: the Utstein style. *Circulation* 1991; 84(2):960-975.
- (16) Jacobs I, Nadkarni V, Bahr J, Berg RA, Billi JE, Bossaert L et al. Cardiac arrest and cardiopulmonary resuscitation outcome reports: update and simplification of the Utstein templates for resuscitation registries: a statement for healthcare professionals from a task force of the International Liaison Committee on Resuscitation (American Heart Association, European Resuscitation Council, Australian Resuscitation Council, New Zealand Resuscitation Council, Heart and Stroke Foundation of Canada, InterAmerican Heart Foundation, Resuscitation Councils of Southern Africa). *Circulation* 2004; 110(21):3385-3397.
- (17) Jennett B, Bond M. Assessment of outcome after severe brain damage. *Lancet* 1975; 1(7905):480-484.
- (18) The Brain Resuscitation Clinical Trial II Study Group. A randomized clinical trial of calcium entry blocker administration to comatose survivors of cardiac arrest: design, methods, and patient characteristics. *Controlled Clin Trials* 1991; 12:525-545.
- (19) Hsu JWY, Callaham M, Madsen CD. Quality-of-Life and Formal Functional Testing of Survivors of Out-of-Hospital Cardiac Arrest Correlates Poorly with Traditional Neurological Outcome Scales. *Ann Emerg Med* 1996; 28:597-605.
- (20) Herlitz J, Ekstrom L, Wennerblom B, Axelsson A, Bang A, Holmberg S. Prognosis Among Survivors of Prehospital Cardiac Arrest. *Ann Emerg Med* 1995; 25:58-63.
- (21) Sneeuw KCA, Sprangers MAG, Aaronson NK. The role of health care providers and significant others in evaluating the quality of life of patients with chronic disease. *Journal of Clinical Epidemiology* 2002; 55(11):1130-1143.
- (22) Wilson JT, Pettigrew LE, Teasdale GM. Structured interviews for the Glasgow Outcome Scale and the extended Glasgow Outcome Scale: guidelines for their use. *Journal of Neurotrauma* 1998; 15(8):573-585.
- (23) Feeny D, Furlong W, Boyle W, Torrance G. Multi-attribute health status classification systems: Health Utilities Index. *PharmacoEconomics* 1995; 7(6):490-502.

- (24) Torrance GW, Furlong W, Feeny D, Boyle M. Multi-attribute preference functions: Health Utilities Index. *Pharmacoeconomics* 1995; 7(6):503-520.
- (25) Feeny D, Furlong W, Torrance GW, Goldsmith CH, Zhu Z, DePauw S et al. Multiattribute and single-attribute utility functions for the health utilities index mark 3 system. *Med Care* 2002; 40(2):113-128.
- (26) Torrance GW, Zhang Y, Feeny D, Furlong W, Barr R. Multi-attribute preference function for a comprehensive health status classification system: Centre for Health Economics and Policy Analysis, McMaster University. 92-18. 1992. McMaster University.  
Ref Type: Report
- (27) Boyle M, Furlong W, Torrance G, Feeny D, Hatcher J. Reliability of the Health Utilities Index-Mark III used in the 1991 cycle 6 Canadian General Social Survey Health Questionnaire. *Quality of Life Research* 1995; 4:249-257.
- (28) Gemke RJ, Bonsel GJ. Reliability and validity of a comprehensive health status measure in a heterogeneous population of children admitted to intensive care. *J Clin Epidemiol* 1996; 49(3):327-333.
- (29) Gold M, Franks P, Erickson P. Assessing the health of the nation. The predictive validity of a preference-based measure and self-rated health. *Med Care* 1996; 34(2):163-177.
- (30) Stiell IG, Spaite DW, Wells GA, Lyver MB, Munkley DP, Field BJ et al. The Ontario Prehospital Advanced Life Support (OPALS) Study: Rationale and Methodology for Cardiac Arrest Patients. *Ann Emerg Med* 1998; 32(2):180-190.
- (31) Gold MR, Siegel JE, Russell LB, Weinstein MC. In: Gold MR, Siegel JE, Russell LB, Weinstein MC, editors. *Cost-effectiveness in Health and Medicine*. New York: Oxford University Press, 1996.
- (32) Folstein MF, Folstein SE, McHugh PR. "Mini-mental state". A practical method for grading the cognitive state of patients for the clinician. *J Psychiatr Res* 1975; 12(3):189-198.
- (33) Roccaforte WH, Burke WJ, Bayer BL, Wengel SP. Validation of a Telephone Version of the Mini-Mental State Examination. *J Am Geriatric Soc* 1992; 40:697-702.
- (34) Armitage SG. An analysis of certain psychological tests used for the evaluation of brain injury. *Psychol Monogr* 1946; 60:1-48.
- (35) Thurston LL, Thurston TG. Examiner Manual for the SRA Primary Mental Abilities Test. Chicago, IL: Science Research Associates, 1949.

- (36) Weschler D, Stone CP. Manual: Weschler Memory Scale. New York: Psychological Corporation, 1983.
- (37) Burke WJ, Roccaforte WH, Wengel SP, Conley DM, Potter JF. The reliability and validity of the Geriatric Depression Rating Scale administered by telephone. *J Am Geriatr Soc* 1995; 43(6):674-679.
- (38) Powell LH, Catellier D, Freedland KE, Burg MM, Woods SL, Bittner V et al. Depression and heart failure in patients with a new myocardial infarction. *American Heart Journal* 2005; 149(5):851-855.
- (39) McDowell I, Kristjansson E. Measuring Health. A Guide to Rating Scales and Questionnaires. 2nd ed. New York: Oxford University Press, 1996.
- (40) Rule BG, Harvey HZ, Dobbs AR. Reliability of the Geriatric Depression Scale for Younger Adults. *Clinical Gerontologist* 1990; 9(2):37-43.



## **Appendix 2. Monitoring of CPR Process**

### ***Rationale for Monitoring CPR Process***

Recent studies have demonstrated that CPR is frequently not performed according to evidence-based guidelines in both the out-of-hospital and in-hospital settings.<sup>1;2</sup> Although these studies lacked power to detect a significant relationship between CPR performance and patient outcome, a related study demonstrated that a greater rate of chest compressions was associated with a greater likelihood of achieving ROSC.<sup>3</sup> The importance of monitoring and improving CPR performance was confirmed by the observation of potentially deleterious hyperventilation in the Milwaukee pilot study of ITD.<sup>4</sup>

### ***Method of Monitoring CPR Process***

All ROC clinical trial sites will implement a high-quality system for monitoring individual components of CPR; specifically, the rate of chest compressions, and the proportion of pulseless resuscitation time during which chest compressions are provided (i.e. CPR fraction), collectively referred to as CPR process. Recent studies show no significant differences in these parameters during the first five minutes of resuscitation as compared with the entire resuscitation episode.<sup>1;2</sup> It is anticipated that during the initial period, interruption of CPR due to rhythm analysis or other procedures is more likely than throughout the resuscitation episode. After insertion of an advanced airway and initiation of ventilation that is asynchronous with chest compressions, hyperventilation is more likely than during the early resuscitation period. Therefore, CPR process will be monitored for a minimum of the first analyzable five minutes in all resuscitations. In addition, CPR process will be monitored for a minimum

of five minutes after receipt of an advanced airway. Where feasible, sites will be encouraged to monitor CPR process for the entire resuscitation. Sites will be required to demonstrate an ability to adequately acquire and analyze these CPR process data, identify and attempt to correct any observed deficiencies, and meet minimum performance standards before being eligible to enroll patients in the present trial. In addition, ongoing monitoring and review of the CPR process will be used throughout the conduct of the trial.

At the completion of every resuscitation attempt, the electronic record from the BLS and ALS devices used during the call will be obtained. All electronic records will be reviewed manually by proprietary automated analysis software. Determination of whether a resuscitation effort meets minimally acceptable CPR performance standards for the ROC will be based on whether it meets acceptable chest compression rate, and CPR fraction criteria as defined in Table 3.

### **References for Monitoring of CPR Process**

- (1) Abella BS, Alvarado JP, Myklebust H, Edelson DP, Barry A, O'Hearn N et al. Quality of cardiopulmonary resuscitation during in-hospital cardiac arrest. *JAMA* 2005; 293(3):305-310.
- (2) Wik L, Kramer-Johansen J, Myklebust H, Sorebo H, Svensson L, Fellows B et al. Quality of cardiopulmonary resuscitation during out-of-hospital cardiac arrest. *JAMA* 2005; 293(3):299-304.
- (3) Abella BS, Sandbo N, Vassilatos P, Alvarado JP, O'Hearn N, Wigder HN et al. Chest compression rates during cardiopulmonary resuscitation are suboptimal: a prospective study during in-hospital cardiac arrest. *Circulation* 2005; 111(4):428-434.
- (4) Aufderheide TP, Sigurdsson G, Pirralo RG, Yannopoulos D, McKnite S, von Briesen C et al. Hyperventilation-induced hypotension during cardiopulmonary resuscitation. *Circulation* 2004; 109(16):1960-1965.
